# Supplementary material
Source: PubMed Central journal article supplement (PMC7427663)

Supplemental Figure 1. Flow chart of data inclusion for analysis of symptom data collected in ARIC study.

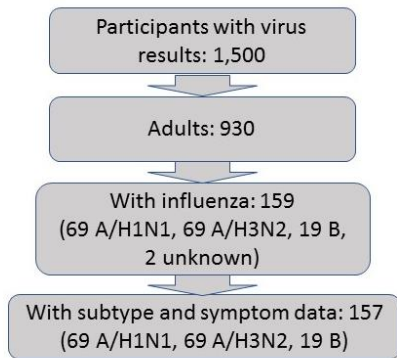

Supplement: supp_figure_1_usaa120.pdf [file supp_figure_1_usaa120.pdf]
