# Supplementary material
Source: PubMed Central journal article supplement (PMC7427663)

Supplemental Figure 2. Symptom severity reported in Flu-Pro survey by 158 ARIC participants;  $\chi^2$  test results were statistically significant ( $p < 0.05$ ) comparing three influenza subtypes for moderate-severe dizziness and muscle soreness.

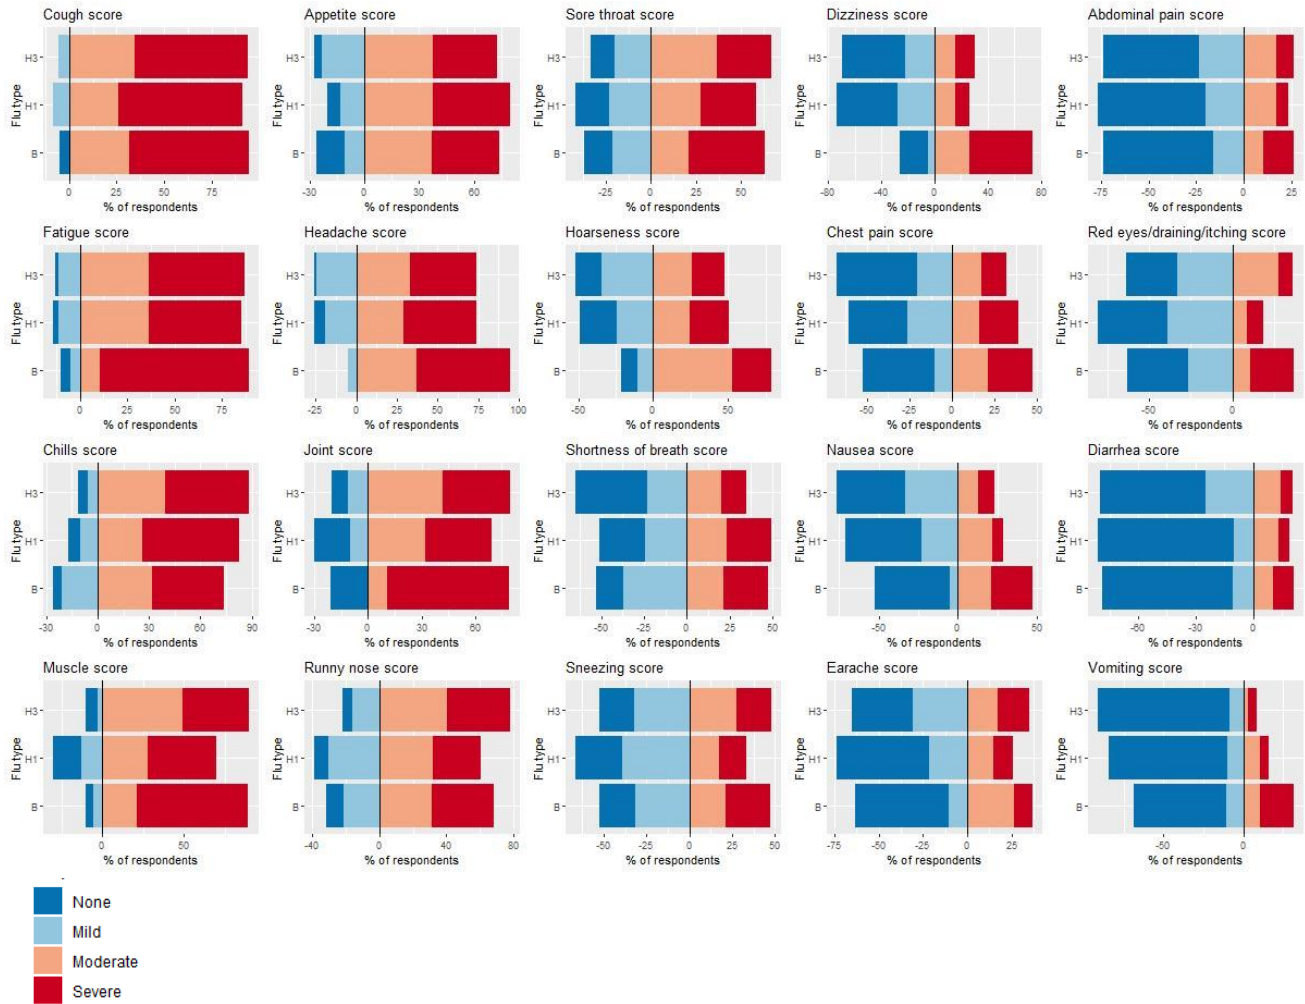

Supplement: supplemental_figure_2_usaa120.pdf [file supplemental_figure_2_usaa120.pdf]
